# Supplementary material for: The IDI1/SREBP2 axis drives intrahepatic cholestasis and is a treatment target of San-Huang-Cai-Zhu formula identified by sequencing and experiments
Source: Front Pharmacol. 2023 Feb 8;14:1093934. doi: 10.3389/fphar.2023.1093934 (PMC9944032; doi:10.3389/fphar.2023.1093934)
Supplement: Supplementary file 2 [file Table1.XLS]

## Sheet: Positive mode
Name	Formula	CAS_num	Class	Annot. DeltaMass [ppm]	Annotation MW	Calc. MW	RT [min]	Area: 221009-528001-SHCZF-P.raw (F1)	Concentration（μg/g）
3-(3-Nitrophenyl)-2'-acrylonaphthone	C19 H13 N O3	22290-84-2	Linear 1,3-diarylpropanoids	-2.17	303.09	303.089	7.91	8.69822e+10	3460.38
5-Hydroxymethyl-2-furaldehyde	C6 H6 O3	67-47-0	Organooxygen compounds	0.84	126.032	126.032	2.609	6.39663e+09	254.475
D-(+)-Proline	C5 H9 N O2	344-25-2	Carboxylic acids and derivatives	1.24	115.063	115.063	0.812	6.34149e+09	252.281
Methoxyphenamine	C11 H17 N O	93-30-1	Benzene and substituted derivatives	-0.6	179.131	179.131	1.498	5.9367e+09	236.177
(+)-Magnoflorine	C20 H23 N O4	2141-09-5	Aporphines	-1.44	341.163	341.162	5.793	5.70491e+09	226.956
(3R,5R)-1,3,5-Trihydroxy-4-{[(2E)-3-(4-hydroxy-3-methoxyphenyl)-2-propenoyl]oxy}cyclohexanecarboxylic acid	C17 H20 O9	NA	Organooxygen compounds	-1.41	368.111	368.11	6.125	4.25389e+09	169.231
DL-Arginine	C6 H14 N4 O2	7200-25-1	Carboxylic acids and derivatives	-0.67	174.112	174.112	0.778	4.13834e+09	164.634
Ethylmorphine	C19 H23 N O3	76-58-4	Morphinans	-1.92	313.168	313.167	6.166	4.11159e+09	163.57
Choline	C5 H13 N O	62-49-7	Organonitrogen compounds	2.78	103.1	103.1	0.777	2.68156e+09	106.679
Epicatechin	C15 H14 O6	490-46-0	Flavonoids	-1.72	290.079	290.079	5.351	1.7964e+09	71.4656
{[{[(2R,3S,4R)-5-(4-Amino-2-oxo-1(2H)-pyrimidinyl)-3,4-dihydroxytetrahydro-2-furanyl]methoxy}(hydroxy)phosphoryl]amino}acetic acid	C11 H17 N4 O9 P	NA	Others	-4.72	380.073	380.072	0.784	1.76938e+09	70.3906
lactide	C6 H8 O4	95-96-5	Dioxanes	-0.29	144.042	144.042	0.032	1.71568e+09	68.2542
N-[(1R)-1-Carboxy-3-(1,3,5,7-tetraoxo-3,5,6,7-tetrahydropyrrolo[3,4-f]isoindol-2(1H)-yl)propyl]-L-leucyl-N-methyl-L-phenylalaninamide	C30 H33 N5 O8	NA	Others	-3.23	591.233	591.231	5.713	1.69303e+09	67.3531
DL-Tryptophan	C11 H12 N2 O2	54-12-6	Indoles and derivatives	-0.48	204.09	204.09	4.535	1.54329e+09	61.3963
p-Coumaraldehyde	C9 H8 O2	20711-53-9	Cinnamaldehydes	-0.83	148.052	148.052	5.685	1.52332e+09	60.6017
Acetophenone	C8 H8 O	98-86-2	Organooxygen compounds	0.75	120.058	120.058	5.684	1.32191e+09	52.5889
1-O-trans-cinnamoyl-beta-D-glucopyranose	C15 H18 O7	40004-96-4	Cinnamic acids and derivatives	-1.59	310.105	310.105	6.804	1.307e+09	51.9958
Phenylacetylene	C8 H6	536-74-3	Benzene and substituted derivatives	1.55	102.047	102.047	2.244	1.17351e+09	46.6854
L-Pyroglutamic acid	C5 H7 N O3	98-79-3	Carboxylic acids and derivatives	-0.3	129.043	129.043	1.159	1.00438e+09	39.9567
Cinnamic acid	C9 H8 O2	140-10-3	Cinnamic acids and derivatives	-1.99	148.052	148.052	7.349	9.49335e+08	37.767
Adenosine	C10 H13 N5 O4	58-61-7	Purine nucleosides	-1.47	267.097	267.096	1.223	9.34137e+08	37.1624
L-Norleucine	C6 H13 N O2	327-57-1	Carboxylic acids and derivatives	0.06	131.095	131.095	1.37	9.09e+08	36.1624
Dimethyl 1-(tetrahydro-2-furanylmethyl)-4-(3,4,5-trimethoxyphenyl)-1,4-dihydro-3,5-pyridinedicarboxylate	C23 H29 N O8	NA	Pyridines and derivatives	-1.36	447.189	447.189	5.531	8.24739e+08	32.8103
7-Ethoxycoumarin	C11 H10 O3	31005-02-4	Coumarins and derivatives	-1.15	190.063	190.063	5.685	8.24697e+08	32.8086
codeinone	C18 H19 N O3	467-13-0	Morphinans	-1.75	297.136	297.136	5.282	8.23873e+08	32.7758
6β-Naltrexol	C20 H25 N O4	49625-89-0	Phenanthrenes and derivatives	-1.59	343.178	343.178	5.717	8.05907e+08	32.0611
NL8513000	C11 H13 N O2	NA	Others	-0.36	191.095	191.095	2.1	7.65696e+08	30.4614
2JXY218SZI	C10 H13 N O	877-95-2	Carboxylic acids and derivatives	-0.82	163.1	163.1	1.129	7.42398e+08	29.5345
Picrotoxinin	C15 H16 O6	17617-45-7	Furopyrans	-1.56	292.095	292.094	7.586	7.33667e+08	29.1872
Iminodimethanethiol	C2 H7 N S2	NA	Thiohemiaminal derivatives	-4.33	109.002	109.002	0.689	6.89201e+08	27.4182
1-{[(3S,4S,5R)-2,3,4-Trihydroxy-5-(hydroxymethyl)tetrahydro-2-furanyl]methyl}-2-pyrrolidinecarboxylic acid (non-preferred name)	C11 H19 N O7	NA	Others	-1.38	277.116	277.116	0.825	6.84045e+08	27.2131
Chlorogenic acid	C16 H18 O9	202650-88-2	Organooxygen compounds	-1.9	354.095	354.094	5.251	6.76908e+08	26.9292
7-Hydroxy-4-methylcoumarin	C10 H8 O3	90-33-5	Coumarins and derivatives	-1.31	176.047	176.047	5.246	6.65923e+08	26.4922
6-Acetylcodeine	C20 H23 N O4	6703-27-1	Morphinans	-1.08	341.163	341.162	6.054	6.3545e+08	25.2799
Dinotefuran	C7 H14 N4 O3	165252-70-0	Organonitrogen compounds	2.87	202.107	202.107	0.797	6.2044e+08	24.6827
Demethyleneberberine	C19 H17 N O4	25459-91-0	Protoberberine alkaloids and derivatives	-1.57	323.116	323.115	6.786	6.11951e+08	24.345
7-Hydroxycoumarine	C9 H6 O3	93-35-6	Coumarins and derivatives	-1.13	162.032	162.032	5.251	5.5026e+08	21.8908
MFCD00024401	C12 H18 N4 O4	NA	Others	-0.88	282.133	282.133	1.684	5.41878e+08	21.5573
2-Hydroxycinnamic acid	C9 H8 O3	614-60-8	Cinnamic acids and derivatives	-0.52	164.047	164.047	1.231	5.37122e+08	21.3681
L-Leucine	C6 H13 N O2	61-90-5	Carboxylic acids and derivatives	0.18	131.095	131.095	1.28	5.2061e+08	20.7112
Sarracenin	C11 H14 O5	59653-37-1	Dioxanes	-1.06	226.084	226.084	5.881	5.15139e+08	20.4936
Betaine	C5 H11 N O2	107-43-7	Carboxylic acids and derivatives	0.79	117.079	117.079	0.83	5.14032e+08	20.4495
Columbianetin	C14 H14 O4	3804-70-4	Coumarins and derivatives	-1	246.089	246.089	8.648	4.63784e+08	18.4505
3,4,5-Trimethoxyphenylacetic acid	C11 H14 O5	951-82-6	Phenol ethers	-1.62	226.084	226.084	5.685	4.47649e+08	17.8087
4-Coumaric acid	C9 H8 O3	7400-08-0	Cinnamic acids and derivatives	-0.46	164.047	164.047	7.108	4.42747e+08	17.6137
Ferulic acid	C10 H10 O4	537-98-4	Cinnamic acids and derivatives	-0.84	194.058	194.058	5.889	4.26705e+08	16.9755
Limonin	C26 H30 O8	1180-71-8	Prenol lipids	-0.97	470.194	470.194	10.844	4.05326e+08	16.1249
Tetrahydropalmatin	C21 H25 N O4	10097-84-4	Protoberberine alkaloids and derivatives	-1.36	355.178	355.178	6.851	3.90994e+08	15.5548
D-(+)-Pipecolinic acid	C6 H11 N O2	1723-00-8	Carboxylic acids and derivatives	0.25	129.079	129.079	0.851	3.19421e+08	12.7074
β-Elemonic acid	C30 H46 O3	28282-25-9	Prenol lipids	-1.57	454.345	454.344	10.282	3.13004e+08	12.4521
O-methylarmepavine	C20 H25 N O3	1934-93-6	Isoquinolines and derivatives	-1.45	327.183	327.183	6.608	2.89447e+08	11.5149
Tetrahydrosappanone A Trimethyl Ether	C19 H22 O5	NA	Homoisoflavonoids	-1.33	330.147	330.146	6.515	2.77598e+08	11.0436
NCGC00380895-01_C27H36O12_1-Cyclohexene-1-carboxylic acid, 4-[[6-O-[(2E)-3-(4-hydroxy-3,5-dimethoxyphenyl)-1-oxo-2-propen-1-yl]-beta-D-glucopyranosyl]oxy]-2,6,6-trimethyl-	C27 H36 O12	NA	Fatty Acyls	-0.56	552.221	552.22	7.494	2.68733e+08	10.6909
Adenine	C5 H5 N5	73-24-5	Imidazopyrimidines	-0.47	135.054	135.054	1.111	2.68439e+08	10.6792
Lawsone	C10 H6 O3	83-72-7	Naphthalenes	-0.76	174.032	174.032	6.879	2.65982e+08	10.5815
(-)-Epicatechin	C15 H14 O6	490-46-0	Flavonoids	-1.61	290.079	290.079	5.872	2.62077e+08	10.4261
Berberrubine	C19 H15 N O4	15401-69-1	Protoberberine alkaloids and derivatives	-1.59	321.1	321.1	7.369	2.61713e+08	10.4116
Guanosine	C10 H13 N5 O5	118-00-3	Purine nucleosides	-1.1	283.092	283.091	1.328	2.5095e+08	9.98344
trans-Ferulic acid; [M+H-H2O]+	C10 H10 O4	537-98-4	Others	-0.51	194.058	194.058	6.62	2.48933e+08	9.90322
Eriodictyol 圣草酚	C15 H12 O6	552-58-9	Flavonoids	-1.02	288.063	288.063	8.782	2.42179e+08	9.63451
N-Fructosyl isoleucine	C12 H23 N O7	NA	Carboxylic acids and derivatives	-1.37	293.147	293.147	1.324	2.32345e+08	9.24331
(2R)-5-Methoxy-2-methyl-2,3,8,9-tetrahydro-4H-furo[2,3-H]chromen-4-one	C13 H14 O4	NA	Benzopyrans	-1.45	234.089	234.089	7.129	2.19832e+08	8.74551
Glycitein	C16 H12 O5	40957-83-3	Isoflavonoids	-1.52	284.068	284.068	9.504	2.19416e+08	8.72894
N-Fructosyl phenylalanine	C15 H21 N O7	NA	Carboxylic acids and derivatives	-1.03	327.132	327.131	2.14	2.18506e+08	8.69274
Jasminoside B	C16 H26 O8	214125-04-9	Organooxygen compounds	-1.38	346.163	346.162	4.419	2.15755e+08	8.58329
(9Z,12E)-15,16-dihydroxyoctadeca-9,12-dienoic acid	C18 H32 O4	NA	Fatty Acyls	-1.28	312.23	312.23	9.851	2.14473e+08	8.53232
Isoliquiritigenin	C15 H12 O4	961-29-5	Linear 1,3-diarylpropanoids	-1.17	256.074	256.073	8.584	1.85267e+08	7.37042
Pelargonidin	C15 H10 O5	7690-51-9	Flavonoids	-1.17	270.053	270.053	9.216	1.84903e+08	7.35593
Procyanidin B1	C30 H26 O12	20315-25-7	Flavonoids	-0.6	578.142	578.142	4.944	1.83164e+08	7.28676
4-Guanidinobutyric acid	C5 H11 N3 O2	463-00-3	Carboxylic acids and derivatives	-0.71	145.085	145.085	0.849	1.82977e+08	7.27929
Aloe-emodin	C15 H10 O5	481-72-1	Anthracenes	-1.17	270.053	270.053	8.684	1.79879e+08	7.15606
7-Methyl-3-methylene-6-(3-oxobutyl)-3,3a,4,7,8,8a-hexahydro-2H-cyclohepta[b]furan-2-one	C15 H20 O3	NA	Prenol lipids	-0.95	248.141	248.141	11.64	1.71461e+08	6.82119
Crocetin	C20 H24 O4	27876-94-4	Prenol lipids	-1.46	328.167	328.167	6.951	1.71362e+08	6.81722
Nodakenin	C20 H24 O9	495-31-8	Coumarins and derivatives	-1.07	408.142	408.142	8.648	1.67399e+08	6.65957
Isoferulic acid	C10 H10 O4	25522-33-2	Cinnamic acids and derivatives	-0.42	194.058	194.058	2.98	1.66683e+08	6.6311
3-Aminoacetophenon	C8 H9 N O	99-03-6	Organooxygen compounds	-0.18	135.068	135.068	1.231	1.63664e+08	6.511
6-Methylcoumarin	C10 H8 O2	92-48-8	Coumarins and derivatives	-0.23	160.052	160.052	5.164	1.63048e+08	6.48646
3,4-Dihydroxybenzaldehyde	C7 H6 O3	139-85-5	Organooxygen compounds	-0.8	138.032	138.032	5.343	1.611e+08	6.40897
4-Indolecarbaldehyde	C9 H7 N O	1047-86-6	Indoles and derivatives	-0.4	145.053	145.053	4.535	1.57962e+08	6.28415
Chrysin	C15 H10 O4	480-40-0	Flavonoids	-1.26	254.058	254.058	8.881	1.55609e+08	6.19055
Metharbital	C9 H14 N2 O3	50-11-3	Diazines	-0.35	198.1	198.1	1.923	1.50328e+08	5.98046
Pyrenocin A putative	C11 H12 O4	76868-97-8	Organooxygen compounds	-0.89	208.074	208.073	2.94	1.50026e+08	5.96843
6-Acetylmorphine	C19 H21 N O4	2784-73-8	Morphinans	-1.61	327.147	327.147	5.024	1.4989e+08	5.96301
MDMA Methylene homolog	C12 H17 N O2	1518611-82-9	Benzodioxoles	-0.72	207.126	207.126	1.484	1.43279e+08	5.70002
(2S)-2-phenyl-7-[(2S,3R,4S,5S,6R)-3,4,5-trihydroxy-6-(hydroxymethyl)oxan-2-yl]oxy-2,3-dihydrochromen-4-one	C21 H22 O8	138166-64-0	Flavonoids	-0.94	402.131	402.131	6.29	1.41192e+08	5.61698
Kojic acid	C6 H6 O4	501-30-4	Pyrans	-0.08	142.027	142.027	4.091	1.37858e+08	5.48437
Anhydrobrazilic Acid	C12 H10 O5	29107-21-9	Benzopyrans	-1.15	234.053	234.053	6.603	1.37596e+08	5.47395
2,5-DMMA	C12 H19 N O2	54687-43-3	Benzene and substituted derivatives	-0.68	209.142	209.141	2.014	1.37173e+08	5.45709
4-AMINOBUTANOATE	C4 H9 N O2	56-12-2	Carboxylic acids and derivatives	3.12	103.063	103.064	0.789	1.37139e+08	5.45574
Catechin gallate	C22 H18 O10	130405-40-2	Flavonoids	-1.27	442.09	442.089	6.774	1.36954e+08	5.44841
Rutin	C27 H30 O16	153-18-4	Flavonoids	-0.92	610.153	610.153	6.443	1.31187e+08	5.21896
Butyl 4-aminobenzoate	C11 H15 N O2	94-25-7	Benzene and substituted derivatives	-0.17	193.11	193.11	2.953	1.22811e+08	4.88576
Acetylarginine	C8 H16 N4 O3	35436-73-8	Carboxylic acids and derivatives	1.01	216.122	216.122	0.846	1.22713e+08	4.88184
Liquiritin	C21 H22 O9	551-15-5	Flavonoids	-1.07	418.126	418.126	6.752	1.20258e+08	4.78418
N-Acetylhistamine	C7 H11 N3 O	673-49-4	Carboxylic acids and derivatives	-0.8	153.09	153.09	1.129	1.18922e+08	4.73103
Nicotinamide	C6 H6 N2 O	98-92-0	Pyridines and derivatives	-1.56	122.048	122.048	1.13	1.17056e+08	4.65681
7,8-Dihydroxy-4-methylcoumarin	C10 H8 O4	2107-77-9	Coumarins and derivatives	-0.76	192.042	192.042	4.348	1.16665e+08	4.64124
Anethole	C10 H12 O	4180-23-8	Phenol ethers	-0.25	148.089	148.089	4.419	1.15106e+08	4.57923
2,3,4,9-Tetrahydro-1H-β-carboline-3-carboxylic acid	C12 H12 N2 O2	42438-90-4	Indoles and derivatives	-1.14	216.09	216.09	5.438	1.14349e+08	4.5491
(+)-Costunolide	C15 H20 O2	553-21-9	Prenol lipids	-0.77	232.146	232.146	12.775	1.14158e+08	4.5415
4-Methylumbelliferyl-α-D-glucopyranoside	C16 H18 O8	17833-43-1	Coumarins and derivatives	-1.11	338.1	338.1	5.87	1.12578e+08	4.47865
Glutamate	C5 H9 N O4	56-86-0	Carboxylic acids and derivatives	-1.4	147.053	147.053	0.813	1.08565e+08	4.31899
Pipecolic acid	C6 H11 N O2	535-75-1	Carboxylic acids and derivatives	0.14	129.079	129.079	1.115	1.08353e+08	4.31057
NCGC00385000-01_C15H18O8_beta-D-Glucopyranose, 1-O-[(2E)-3-(2-hydroxyphenyl)-1-oxo-2-propen-1-yl]-	C15 H18 O8	NA	Cinnamic acids and derivatives	-1.08	326.1	326.1	5.112	1.07711e+08	4.28501
Sinapyl aldehyde	C11 H12 O4	4206-58-0	Phenols	-0.55	208.074	208.073	6.335	1.07364e+08	4.27121
Ethyl 4-(dimethylamino)benzoate	C11 H15 N O2	10287-53-3	Benzene and substituted derivatives	-0.56	193.11	193.11	1.392	1.07324e+08	4.26963
Phenacetin	C10 H13 N O2	62-44-2	Benzene and substituted derivatives	-0.89	179.095	179.094	6.609	1.06532e+08	4.23812
MLS002153900-01!Scoulerine6451-73-6	C19 H21 N O4	NA	Others	-1.43	327.147	327.147	4.817	1.04269e+08	4.1481
trans-Cinnamic acid	C9 H8 O2	140-10-3	Cinnamic acids and derivatives	-0.27	148.052	148.052	7.984	1.04234e+08	4.14672
Indole	C8 H7 N	120-72-9	Indoles and derivatives	0.85	117.058	117.058	4.533	1.04152e+08	4.14344
Sedanolide	C12 H18 O2	6415-59-4	Isobenzofurans	-0.56	194.131	194.131	9.855	1.03509e+08	4.11784
Methyl chlorogenate	C17 H20 O9	123483-19-2	Organooxygen compounds	-1.07	368.111	368.11	7.482	1.0283e+08	4.09085
Nicotinic acid	C6 H5 N O2	59-67-6	Pyridines and derivatives	0.41	123.032	123.032	1.129	9.93046e+07	3.9506
Targinine	C7 H16 N4 O2	17035-90-4	Carboxylic acids and derivatives	-0.92	188.127	188.127	0.782	9.90461e+07	3.94032
Obacunone	C26 H30 O7	310-75-1	Prenol lipids	-0.74	454.199	454.199	11.707	9.60897e+07	3.8227
Scopoletin	C10 H8 O4	92-61-5	Coumarins and derivatives	-0.93	192.042	192.042	6.872	9.52214e+07	3.78816
Jatrorrhizine 药根碱	C20 H19 N O4	3621-38-3	Protoberberine alkaloids and derivatives	-1.31	337.131	337.131	7.269	9.2367e+07	3.6746
7-Methoxy-4-methylcoumarin	C11 H10 O3	2555-28-4	Coumarins and derivatives	-1.06	190.063	190.063	6.113	9.04925e+07	3.60003
3-(2,6-Dioxocyclohexyl)propanenitrile	C9 H11 N O2	1874-85-7	Organooxygen compounds	-0.54	165.079	165.079	1.129	8.95421e+07	3.56222
Dibutyl phthalate	C16 H22 O4	84-74-2	Benzene and substituted derivatives	-0.76	278.152	278.152	8.624	8.89586e+07	3.53901
D-(+)-Maltose	C12 H22 O11	69-79-4	Organooxygen compounds	-1.73	342.116	342.116	0.787	8.76348e+07	3.48634
Trigonelline	C7 H7 N O2	535-83-1	Pyridines and derivatives	-0.67	137.048	137.048	0.813	8.59218e+07	3.4182
2-Furoic acid	C5 H4 O3	88-14-2	Furans	2	112.016	112.016	1.543	7.72285e+07	3.07235
Iso-gamma-fagarine	C13 H11 N O3	NA	Quinolines and derivatives	-0.97	229.074	229.074	9.994	7.66639e+07	3.04989
Dihydropalmatine	C21 H23 N O4	26067-60-7	Protoberberine alkaloids and derivatives	-1.39	353.163	353.162	7.688	7.66483e+07	3.04927
Gallic acid	C7 H6 O5	149-91-7	Benzene and substituted derivatives	-0.07	170.022	170.022	1.786	7.64999e+07	3.04337
2-Naphthylamine	C10 H9 N	91-59-8	Naphthalenes	-0.18	143.073	143.073	4.533	7.62122e+07	3.03192
Saikosaponin A	C42 H68 O13	20736-09-8	Prenol lipids	-1.18	780.466	780.465	10.282	7.6048e+07	3.02539
(1S,3R,4R,5R)-3-[(E)-3-(3,4-dihydroxyphenyl)prop-2-enoyl]oxy-1,5-dihydroxy-4-[(E)-3-(4-hydroxy-3,5-dimethoxyphenyl)prop-2-enoyl]oxycyclohexane-1-carboxylic acid	C27 H28 O13	NA	Organooxygen compounds	-0.42	560.153	560.153	7.728	7.48766e+07	2.97879
Vanillin	C8 H8 O3	121-33-5	Phenols	-0.76	152.047	152.047	6.606	7.39335e+07	2.94127
Sinapoyl aldehyde	C11 H12 O4	4206-58-0	Phenols	-0.42	208.074	208.073	2.686	7.33624e+07	2.91855
DL-Carnitine	C7 H15 N O3	406-76-8	Organonitrogen compounds	-0.69	161.105	161.105	0.84	7.15907e+07	2.84806
genipin 1-gentiobioside	C23 H34 O15	29307-60-6	Prenol lipids	-1.14	550.19	550.189	5.247	6.94309e+07	2.76214
Epiafzelechin (2R,3R)(-)	C15 H14 O5	24808-04-6	Flavonoids	-1.23	274.084	274.084	7.457	6.74304e+07	2.68256
4-Hydroxybenzaldehyde	C7 H6 O2	123-08-0	Organooxygen compounds	0.78	122.037	122.037	1.231	6.51082e+07	2.59018
Pantothenic acid	C9 H17 N O5	79-83-4	Organooxygen compounds	-0.81	219.111	219.11	2.858	6.44278e+07	2.56311
Histamine	C5 H9 N3	51-45-6	Organonitrogen compounds	2.25	111.08	111.08	1.303	6.38942e+07	2.54188
Normorphine	C16 H17 N O3	466-97-7	Morphinans	-1.15	271.121	271.121	4.781	6.35498e+07	2.52818
NCGC00347599-02_C32H40O17_Methyl (1S,4aS,7aS)-7-(hydroxymethyl)-1-[(6-O-{6-O-[(2E)-3-(4-hydroxyphenyl)-2-propenoyl]-beta-D-glucopyranosyl}-beta-D-glucopyranosyl)oxy]-1,4a,5,7a-tetrahydrocyclopenta[c]pyran-4-carboxylate	C32 H40 O17	NA	Prenol lipids	-0.75	696.227	696.226	7.106	6.28047e+07	2.49854
Sinapinic acid	C11 H12 O5	530-59-6	Cinnamic acids and derivatives	-1.07	224.068	224.068	5.027	6.21539e+07	2.47265
Prolylleucine	C11 H20 N2 O3	52899-07-7	Carboxylic acids and derivatives	-1.03	228.147	228.147	1.393	5.86385e+07	2.33279
Nalbuphine	C21 H27 N O4	20594-83-6	Phenanthrenes and derivatives	-1.85	357.194	357.193	6.16	5.81274e+07	2.31246
Uracil	C4 H4 N2 O2	66-22-8	Diazines	1.49	112.027	112.027	1.164	5.75314e+07	2.28875
trans-Cinnamaldehyde	C9 H8 O	104-55-2	Cinnamaldehydes	0.21	132.058	132.058	5.163	5.41022e+07	2.15233
L-Histidine	C6 H9 N3 O2	71-00-1	Carboxylic acids and derivatives	-0.5	155.069	155.069	0.714	5.3187e+07	2.11592
skimmianine	C14 H13 N O4	83-95-4	Quinolines and derivatives	-1.17	259.084	259.084	9.838	5.17814e+07	2.06
Hydromorphinol	C17 H21 N O4	2183-56-4	Phenanthrenes and derivatives	-1.43	303.147	303.147	6.67	5.06251e+07	2.014
4-Methoxybenzaldehyde	C8 H8 O2	123-11-5	Benzene and substituted derivatives	-0.25	136.052	136.052	5.438	5.04914e+07	2.00868
Feruloyl tyramine	C18 H19 N O4	66648-43-9	Cinnamic acids and derivatives	-1.31	313.131	313.131	8.325	5.03215e+07	2.00192
Methyl cinnamate	C10 H10 O2	103-26-4	Cinnamic acids and derivatives	-0.9	162.068	162.068	5.885	4.88844e+07	1.94475
TDIQ	C10 H11 N O2	15052-05-8	Tetrahydroisoquinolines	-0.16	177.079	177.079	1.71	4.76365e+07	1.89511
(S)-N-α-benzoylarginine ethyl ester	C15 H22 N4 O3	NA	Benzene and substituted derivatives	-1.54	306.169	306.169	5.657	4.73354e+07	1.88313
3-(4-Nitrophenyl)imidazo[1,5-a]pyridine	C13 H9 N3 O2	NA	Azoles	4.59	239.069	239.071	7.551	4.71203e+07	1.87457
Scoparone	C11 H10 O4	120-08-1	Coumarins and derivatives	-0.96	206.058	206.058	10.716	4.67857e+07	1.86126
2,2,6,6-Tetramethyl-1-piperidinol (TEMPO)	C9 H19 N O	2564-83-2	Piperidines	-0.36	157.147	157.147	10.469	4.62108e+07	1.83839
2,3-dihydroxy-1-(4-hydroxy-3-methoxyphenyl)-propan-1-one	C10 H12 O5	168293-10-5	Organooxygen compounds	-0.18	212.068	212.068	4.068	4.55465e+07	1.81196
3-[4-methyl-1-(2-methylpropanoyl)-3-oxocyclohexyl]butanoic acid	C15 H24 O4	5956-06-9	Prenol lipids	-1.56	268.167	268.167	6.56	4.53985e+07	1.80607
Caffeic acid	C9 H8 O4	331-39-5	Cinnamic acids and derivatives	-0.69	180.042	180.042	5.748	4.44309e+07	1.76758
Syringic acid	C9 H10 O5	530-57-4	Benzene and substituted derivatives	-1.12	198.053	198.053	4.183	4.43478e+07	1.76427
N-Acetyltyramine	C10 H13 N O2	1202-66-0	Phenols	1.07	179.095	179.095	1.643	4.41901e+07	1.758
(2E)-3-(4-Hydroxyphenyl)-N-[2-(4-hydroxyphenyl)ethyl]acrylamide	C17 H17 N O3	36417-86-4	Cinnamic acids and derivatives	-1.64	283.121	283.12	8.097	4.40222e+07	1.75132
Guanine	C5 H5 N5 O	73-40-5	Imidazopyrimidines	0.67	151.049	151.05	0.853	4.37245e+07	1.73948
NCGC00180111-02!1,6,8-trihydroxy-3-methyl-9,10-dioxoanthracene-2-carboxylic acid	C16 H10 O7	481-70-9	Anthracenes	-1.17	314.043	314.042	7.034	4.37018e+07	1.73857
6,7-Dihydroxy-4-methylcoumarin	C10 H8 O4	529-84-0	Coumarins and derivatives	-1.1	192.042	192.042	4.616	4.32385e+07	1.72014
Pyridoxine + O-Hex	C14 H21 N O8	NA	Pyridines and derivatives	-1.81	331.127	331.126	1.129	4.30518e+07	1.71271
Pyridoxine	C8 H11 N O3	65-23-6	Pyridines and derivatives	-0.41	169.074	169.074	3.01	4.25572e+07	1.69304
[3,4,5-trihydroxy-6-(hydroxymethyl)oxan-2-yl] 2,4-dihydroxy-6-[(E)-2-phenylethenyl]benzoate	C21 H22 O9	NA	Stilbenes	-1.29	418.126	418.126	8.309	4.23452e+07	1.68461
Radicinin	C12 H12 O5	10088-95-6	Organooxygen compounds	-1.07	236.068	236.068	6.963	4.22124e+07	1.67932
NCGC00385785-01!(2R,3R,4S,5S,6R)-2-[[2-(3,4-dihydroxyphenyl)-5,7-dihydroxy-3,4-dihydro-2H-chromen-3-yl]oxy]-6-(hydroxymethyl)oxane-3,4,5-triol	C21 H24 O11	NA	Flavonoids	-0.95	452.132	452.131	4.231	4.20859e+07	1.67429
13(S)-HOTrE	C18 H30 O3	87984-82-5	Fatty Acyls	-1	294.219	294.219	11.96	4.18688e+07	1.66565
Cytosine	C4 H5 N3 O	71-30-7	Diazines	1.57	111.043	111.043	1.114	4.08295e+07	1.62431
Phthaldialdehyde	C8 H6 O2	643-79-8	Benzene and substituted derivatives	-0.56	134.037	134.037	5.253	4.05455e+07	1.61301
N-(2,4-Dimethylphenyl)formamide	C9 H11 N O	60397-77-5	Benzene and substituted derivatives	-0.11	149.084	149.084	1.596	3.99923e+07	1.591
9S,13R-12-Oxophytodienoic acid	C18 H28 O3	67204-66-4	Fatty Acyls	-1.56	292.204	292.203	9.5	3.95766e+07	1.57446
(2S,3R,4S,5S,6R)-2-[4-(3-Hydroxybutyl)phenoxy]-6-(hydroxymethyl)oxane-3,4,5-triol	C16 H24 O7	NA	Organooxygen compounds	-1.05	328.152	328.152	6.319	3.91236e+07	1.55644
NCGC00384740-01_C21H34O9_2(1H)-Azulenone, 6-(beta-D-glucopyranosyloxy)-4,5,6,7,8,8a-hexahydro-5-hydroxy-5-(1-hydroxy-1-methylethyl)-3,8-dimethyl-	C21 H34 O9	NA	Prenol lipids	-1.4	430.22	430.22	6.56	3.90068e+07	1.55179
Coumarin	C9 H6 O2	91-64-5	Coumarins and derivatives	-0.89	146.037	146.037	4.612	3.88273e+07	1.54465
Trioxsalen	C14 H12 O3	3902-71-4	Coumarins and derivatives	-1.53	228.079	228.078	8.113	3.83293e+07	1.52484
[(2S,3R,4S,5S,6R)-3,4,5-trihydroxy-6-[[(E)-3-phenylprop-2-enoyl]oxymethyl]oxan-2-yl] 3,4,5-trihydroxybenzoate	C22 H22 O11	115746-69-5	Tannins	-1.01	462.116	462.116	7.618	3.75311e+07	1.49308
6,7-Dimethoxy-2-oxo-2H-chromen-8-yl β-D-glucopyranoside	C17 H20 O10	NA	Coumarins and derivatives	-1.45	384.106	384.105	6.957	3.62037e+07	1.44028
Nalorphine	C19 H21 N O3	62-67-9	Morphinans	-1.26	311.152	311.152	6.73	3.55856e+07	1.41569
Quercetin-3β-D-glucoside	C21 H20 O12	482-35-9	Flavonoids	-0.85	464.095	464.095	6.67	3.51917e+07	1.40002
isoboldine	C19 H21 N O4	3019-51-0	Aporphines	-1.33	327.147	327.147	6.023	3.51818e+07	1.39962
Apigenin	C15 H10 O5	520-36-5	Flavonoids	-1.51	270.053	270.052	8.251	3.47366e+07	1.38191
Dehydrosalsolidine	C12 H15 N O2	4721-98-6	Dihydroisoquinolines	-0.23	205.11	205.11	4.32	3.46761e+07	1.37951
2-(4-Methoxybenzylidene)quinuclidin-3-one	C15 H17 N O2	52407-93-9	Quinuclidines	-1.11	243.126	243.126	11.307	3.34386e+07	1.33027
Quercetin	C15 H10 O7	117-39-5	Flavonoids	-1.62	302.043	302.042	6.44	3.34105e+07	1.32916
1,2,3,4-Tetramethyl-1,3-cyclopentadiene	C9 H14	4249-10-9	Unsaturated hydrocarbons	1.14	122.11	122.11	5.994	3.29746e+07	1.31181
2-Benzo[b]furan-2-yl-3-(4-fluorophenyl)-1,3-thiazolan-4-one	C17 H12 F N O2 S	NA	Benzofurans	2.89	313.057	313.058	4.808	3.25734e+07	1.29585
Leucylproline	C11 H20 N2 O3	6403-35-6	Carboxylic acids and derivatives	-0.76	228.147	228.147	4.413	3.24619e+07	1.29142
4-Methyl-6,7-dihydroxycoumarin	C10 H8 O4	529-84-0	Coumarins and derivatives	-0.94	192.042	192.042	4.167	3.18557e+07	1.2673
(3aR,4aS,5R,7aS,8S,9aR)-5-Hydroxy-4a,8-dimethyl-3-methyleneoctahydroazuleno[6,5-b]furan-2,6(3H,4H)-dione	C15 H20 O4	NA	Prenol lipids	-1.15	264.136	264.136	4.93	3.16306e+07	1.25835
alpha-guaiaconic acid	C20 H20 O5	10035-27-5	Furans	-1.03	340.131	340.131	6.502	3.09736e+07	1.23221
Phenylacetaldehyde	C8 H8 O	122-78-1	Benzene and substituted derivatives	0.74	120.058	120.058	6.276	3.06714e+07	1.22019
6-Hydroxypicolinic acid	C6 H5 N O3	19621-92-2	Pyridines and derivatives	-0.81	139.027	139.027	1.155	3.00777e+07	1.19657
Flavone base + 3O, O-MalonylHex	C24 H22 O13	NA	Flavonoids	-0.54	518.106	518.106	7.151	2.91035e+07	1.15781
Dopamine	C8 H11 N O2	51-61-6	Phenols	-1.93	153.079	153.079	1.128	2.90274e+07	1.15478
(2S,3S)-3-hydroxy-4-methoxy-2-(2-phenylethyl)-2,3-dihydropyran-6-one	C14 H16 O4	NA	Kavalactones	-0.98	248.105	248.105	6.72	2.88197e+07	1.14652
(2S)-4-hydroxy-2-(2-hydroxypropan-2-yl)-7-methyl-2,3-dihydrofuro[3,2-g]chromen-5-one	C15 H16 O5	492-52-4	Benzopyrans	-0.85	276.1	276.1	7.023	2.88062e+07	1.14599
Ribalinine	C15 H17 N O3	7688-58-6	Quinolines and derivatives	-1.32	259.121	259.12	6.561	2.83022e+07	1.12594
diethyl 4-(4-hydroxy-3-methoxyphenyl)-2,6-dimethylpyridine-3,5-dicarboxylate	C20 H23 N O6	NA	Pyridines and derivatives	-1.48	373.153	373.152	5.634	2.76864e+07	1.10144
6-Hydroxy-5a,9-dimethyl-3-methylene-3a,4,5,5a,6,7,9a,9b-octahydronaphtho[1,2-b]furan-2(3H)-one	C15 H20 O3	NA	Prenol lipids	-1.14	248.141	248.141	9.432	2.75054e+07	1.09424
Hypoxanthine	C5 H4 N4 O	68-94-0	Imidazopyrimidines	-0.19	136.039	136.038	1.343	2.70458e+07	1.07595
Feruloyl O-methyldopamine	C19 H21 N O5	78510-20-0	Cinnamic acids and derivatives	-1.92	343.142	343.141	8.544	2.68903e+07	1.06977
NCGC00380892-01_C26H30O12_Cyclopenta[c]pyran-4-carboxylic acid, 1,4a,5,7a-tetrahydro-7-(hydroxymethyl)-1-[[6-O-[(2E)-3-(4-hydroxyphenyl)-1-oxo-2-propen-1-yl]-beta-D-glucopyranosyl]oxy]-, methyl ester	C26 H30 O12	NA	Prenol lipids	-0.8	534.174	534.173	7.107	2.68876e+07	1.06966
2'-Deoxyadenosine	C10 H13 N5 O3	958-09-8	Purine nucleosides	-1.16	251.102	251.102	1.276	2.59307e+07	1.03159
4-Quinolinecarboxylic acid	C10 H7 N O2	486-74-8	Quinolines and derivatives	-0.49	173.048	173.048	6.287	2.51681e+07	1.00125
2-AMINO-3-(2-CHLORO-PHENYL)-PROPIONIC ACID	C9 H10 Cl N O2	14091-11-3	内标	-0.67	199.04	199.04	4.508	1.2884e+08	1

## Sheet: negative mode
Name	Formula	CAS_num	Class	Annot. DeltaMass [ppm]	Annotation MW	Calc. MW	RT [min]	Area: 221009-528001-SHCZF-N.raw (F1)	Concentration（μg/g）
Geniposide	C17 H24 O10	24512-63-8	Prenol lipids	4.74	388.137	388.139	5.694	1.52133e+10	7114.3
(3R,5R)-1,3,5-Trihydroxy-4-{[(2E)-3-(4-hydroxy-3-methoxyphenyl)-2-propenoyl]oxy}cyclohexanecarboxylic acid	C17 H20 O9	NA	Organooxygen compounds	4.33	368.111	368.112	6.13	1.23652e+10	5782.4
Gallic acid	C7 H6 O5	149-91-7	Benzene and substituted derivatives	-1.05	170.022	170.021	1.797	6.25288e+09	2924.07
Methyl chlorogenate	C17 H20 O9	123483-19-2	Organooxygen compounds	3.53	368.111	368.112	5.431	5.36927e+09	2510.87
Catechin	C15 H14 O6	154-23-4	Flavonoids	3.96	290.079	290.08	5.352	4.03602e+09	1887.39
N-[4-(Acetylsulfamoyl)phenyl]-2-phenyl-2-(phenylsulfanyl)acetamide	C22 H20 N2 O4 S2	NA	Benzene and substituted derivatives	-1.89	440.086	440.086	0.887	3.57694e+09	1672.71
6-O-[(2E)-3-Phenyl-2-propenoyl]-1-O-(3,4,5-trihydroxybenzoyl)-β-D-glucopyranose	C22 H22 O11	NA	Tannins	4.46	462.116	462.118	7.589	3.07397e+09	1437.5
Rheic acid 大黄酸	C15 H8 O6	478-43-3	Anthracenes	3.55	284.032	284.033	10.962	2.71843e+09	1271.24
sinapoylglucose	C17 H22 O10	NA	Cinnamic acids and derivatives	4.09	386.121	386.123	6.393	2.42982e+09	1136.27
Chlorogenic acid	C16 H18 O9	202650-88-2	Organooxygen compounds	3.8	354.095	354.096	5.25	2.385e+09	1115.31
DL-Malic acid	C4 H6 O5	6915-15-7	Hydroxy acids and derivatives	-3.72	134.022	134.021	0.851	2.31421e+09	1082.21
Gluconic acid	C6 H12 O7	526-95-4	Organooxygen compounds	0.15	196.058	196.058	0.785	2.29232e+09	1071.97
(4S)-4-[2-(beta-D-Glucopyranosyloxy)-2-propanyl]-1-cyclohexene-1-carboxylic acid	C16 H26 O8	NA	Others	4.13	346.163	346.164	4.439	2.23948e+09	1047.26
(15Z)-9,12,13-Trihydroxy-15-octadecenoic acid	C18 H34 O5	NA	Fatty Acyls	3.94	330.241	330.242	9.856	2.18054e+09	1019.7
α,α-Trehalose	C12 H22 O11	99-20-7	Organooxygen compounds	3.98	342.116	342.118	0.786	2.02249e+09	945.79
Apigenin-7-O-glucoside	C21 H20 O10	578-74-5	Flavonoids	3.71	432.106	432.107	8.79	1.95494e+09	914.202
1-Deoxy-1-{2,6,8-trioxo-7-[3-(phosphonooxy)propyl]-1,2,3,6,7,8-hexahydro-9H-purin-9-yl}-D-ribitol	C13 H21 N4 O11 P	NA	Imidazopyrimidines	-0.23	440.094	440.094	0.789	1.85871e+09	869.198
Apigenin	C15 H10 O5	520-36-5	Flavonoids	3.9	270.053	270.054	12.2	1.69069e+09	790.628
genipin 1-gentiobioside	C23 H34 O15	29307-60-6	Prenol lipids	4.43	550.19	550.192	5.242	1.63885e+09	766.386
D-(-)-Quinic acid	C7 H12 O6	77-95-2	Organooxygen compounds	0.09	192.063	192.063	0.803	1.60932e+09	752.575
Neochlorogenic acid	C16 H18 O9	906-33-2	Organooxygen compounds	3.47	354.095	354.096	4.472	1.30498e+09	610.258
Ethyl 1'-(2-pyrimidinyl)-3a,4,8,8a-tetrahydrospiro[1,3-dioxepino[5,6-d][1,2]oxazole-6,4'-piperidine]-3-carboxylate	C17 H22 N4 O5	NA	Others	0.5	362.159	362.159	2.869	1.30276e+09	609.219
4,4'-Dinitroazobenzene	C12 H8 N4 O4	3646-57-9	Azobenzenes	0.15	272.055	272.055	1.435	1.27325e+09	595.418
Glucogallin	C13 H16 O10	58511-73-2	Benzene and substituted derivatives	4.29	332.074	332.076	1.322	1.21512e+09	568.235
Kanzakiflavone 2	C16 H10 O6	NA	Flavonoids	3.29	298.048	298.049	10.312	1.0963e+09	512.669
Pyrogallol	C6 H6 O3	87-66-1	Phenols	-4.32	126.032	126.031	1.797	1.08584e+09	507.78
N,N'-1,2-Propanediylbis(2-nitrobenzamide)	C17 H16 N4 O6	NA	Benzene and substituted derivatives	0.33	372.107	372.107	5.916	1.08317e+09	506.531
1-O-trans-cinnamoyl-beta-D-glucopyranose	C15 H18 O7	40004-96-4	Cinnamic acids and derivatives	4.42	310.105	310.107	6.816	1.05124e+09	491.596
MFCD00033945	C14 H12 N4 O5	NA	Others	-0.12	316.081	316.081	5.035	1.04432e+09	488.361
5,7,2'-Trihydroxyflavone 7-glucuronide	C21 H18 O11	NA	Flavonoids	4.38	446.085	446.087	6.571	1.03389e+09	483.482
Chrysophanol 8-O-β-D-glucoside	C21 H20 O9	13241-28-6	Anthracenes	4.18	416.111	416.112	8.889	9.42236e+08	440.624
Tinnevellin glucoside 丁内未利葡萄糖苷	C20 H24 O9	80358-06-1	Organooxygen compounds	3.84	408.142	408.144	8.655	8.643e+08	404.178
Daidzein	C15 H10 O4	486-66-8	Isoflavonoids	2.99	254.058	254.059	8.889	8.03432e+08	375.714
4-Oxoproline	C5 H7 N O3	2002-02-0	Carboxylic acids and derivatives	-4.08	129.043	129.042	1.161	7.76261e+08	363.008
NCGC00380895-01_C27H36O12_1-Cyclohexene-1-carboxylic acid, 4-[[6-O-[(2E)-3-(4-hydroxy-3,5-dimethoxyphenyl)-1-oxo-2-propen-1-yl]-beta-D-glucopyranosyl]oxy]-2,6,6-trimethyl-	C27 H36 O12	NA	Fatty Acyls	4.39	552.221	552.223	7.487	6.71176e+08	313.866
N-({(2R,4S,5R)-5-[2-Methyl-6-(2-thienyl)-4-pyrimidinyl]-1-azabicyclo[2.2.2]oct-2-yl}methyl)methanesulfonamide	C18 H24 N4 O2 S2	NA	Others	-1.23	392.134	392.134	3.002	6.43236e+08	300.801
epicatechin gallate	C22 H18 O10	1257-08-5	Flavonoids	4.09	442.09	442.092	6.771	6.00777e+08	280.945
D-(-)-Fructose	C6 H12 O6	57-48-7	Organooxygen compounds	0	180.063	180.063	1.25	5.34752e+08	250.07
Emodin-8-Beta-D-Glucoside	C21 H20 O10	23313-21-5	Anthracenes	3.9	432.106	432.107	6.485	5.05049e+08	236.179
Coumaroyl quinic acid (isomer of 758, 760)	C16 H18 O8	NA	Organooxygen compounds	4.54	338.1	338.102	5.884	5.0234e+08	234.912
Procyanidin B2	C30 H26 O12	29106-49-8	Flavonoids	4.18	578.142	578.145	4.942	5.01332e+08	234.441
Apigetrin	C21 H20 O10	578-74-5	Flavonoids	3.39	432.106	432.107	8.691	4.62603e+08	216.33
1-O-b-D-glucopyranosyl sinapate	C17 H22 O10	78185-48-5	Cinnamic acids and derivatives	4.1	386.121	386.123	5.673	4.56037e+08	213.259
Mesaconic acid	C5 H6 O4	498-24-8	Fatty Acyls	-4.73	130.027	130.026	0.914	4.3747e+08	204.577
Methyl 1-(hexopyranosyloxy)-4a-hydroxy-7-methyl-5-oxo-1,4a,5,6,7,7a-hexahydrocyclopenta[c]pyran-4-carboxylate	C17 H24 O11	50816-24-5	Prenol lipids	4.85	404.132	404.134	4.621	4.33994e+08	202.951
(1S,3R,4R,5R)-3-[(E)-3-(3,4-dihydroxyphenyl)prop-2-enoyl]oxy-1,5-dihydroxy-4-[(E)-3-(4-hydroxy-3,5-dimethoxyphenyl)prop-2-enoyl]oxycyclohexane-1-carboxylic acid	C27 H28 O13	NA	Organooxygen compounds	4.21	560.153	560.155	7.73	4.01545e+08	187.777
Alizarin	C14 H8 O4	72-48-0	Anthracenes	2.1	240.042	240.043	10.965	3.99747e+08	186.936
[3,4,5-trihydroxy-6-(hydroxymethyl)oxan-2-yl] 3-hydroxy-4,5-dimethoxybenzoate	C15 H20 O10	NA	Tannins	3.8	360.106	360.107	4.21	3.888e+08	181.817
(1S,3R,4S,5R)-4-[(4-carboxy-3-hydroxy-3-methylbutanoyl)oxy]-3,5-bis({[(2E)-3-(3,4-dihydroxyphenyl)prop-2-enoyl]oxy})-1-hydroxycyclohexane-1-carboxylic acid	C31 H32 O16	NA	Carboxylic acids and derivatives	4.7	660.169	660.172	7.4	3.72008e+08	173.965
Citric acid	C6 H8 O7	77-92-9	Carboxylic acids and derivatives	-0.06	192.027	192.027	1.795	3.69384e+08	172.737
Octyl gallate	C15 H22 O5	1034-01-1	Benzene and substituted derivatives	3.74	282.147	282.148	10.118	3.59534e+08	168.131
Lariciresinol 4-O-glucoside	C26 H34 O11	107110-16-7	Lignans, neolignans and related compounds	4.36	522.21	522.212	6.508	3.49098e+08	163.251
D-(+)-Tryptophan	C11 H12 N2 O2	153-94-6	Indoles and derivatives	1.27	204.09	204.09	4.548	3.47744e+08	162.618
Rutin	C27 H30 O16	153-18-4	Flavonoids	4.92	610.153	610.156	6.441	3.38655e+08	158.367
Benzoic acid + 2O, O-Hex	C13 H16 O9	NA	Organooxygen compounds	4.05	316.079	316.081	2.817	3.2597e+08	152.436
Shanzhiside methyl ester	C17 H26 O11	64421-28-9	Prenol lipids	4.65	406.148	406.149	2.679	2.92276e+08	136.679
Liquiritin	C21 H22 O9	551-15-5	Flavonoids	4.46	418.126	418.128	8.587	2.83641e+08	132.641
Azelaic acid	C9 H16 O4	123-99-9	Fatty Acyls	-0.25	188.105	188.105	7.475	2.81903e+08	131.828
Corchorifatty acid F	C18 H32 O5	95341-44-9	Fatty Acyls	3.42	328.225	328.226	9.499	2.79101e+08	130.518
Gentisic acid	C7 H6 O4	490-79-9	Benzene and substituted derivatives	-2.27	154.027	154.026	3.841	2.72217e+08	127.298
Methylmalonic acid	C4 H6 O4	516-05-2	Carboxylic acids and derivatives	-4.97	118.027	118.026	1.368	2.70904e+08	126.685
N-Acetyl-L-phenylalanine	C11 H13 N O3	2018-61-3	Carboxylic acids and derivatives	0.85	207.09	207.09	6.529	2.60741e+08	121.932
NCGC00385542-01!3-oxo-3-[[(2R,3S,4S,5R,6S)-3,4,5-trihydroxy-6-[5-hydroxy-3-(4-hydroxyphenyl)-4-oxochromen-7-yl]oxyoxan-2-yl]methoxy]propanoic acid	C24 H22 O13	51011-05-3	Isoflavonoids	3.23	518.106	518.108	9.337	2.44677e+08	114.42
Caffeic acid	C9 H8 O4	331-39-5	Cinnamic acids and derivatives	-0.81	180.042	180.042	5.749	2.35233e+08	110.003
L-Asparagine	C4 H8 N2 O3	3130-87-8	Carboxylic acids and derivatives	-3.44	132.053	132.053	0.753	2.28317e+08	106.769
D-Fructose	C6 H12 O6	53188-23-1	Organooxygen compounds	0.85	180.063	180.064	0.783	2.24847e+08	105.146
Glycitein	C16 H12 O5	40957-83-3	Isoflavonoids	3.3	284.068	284.069	9.924	2.19518e+08	102.654
L(+)-Arginine	C6 H14 N4 O2	74-79-3	Carboxylic acids and derivatives	-0.66	174.112	174.112	0.74	2.17027e+08	101.49
L-(-)-Arabitol	C5 H12 O5	7643-75-6	Organooxygen compounds	-1.59	152.068	152.068	0.77	1.95643e+08	91.4896
(+/-)9-HpODE	C18 H32 O4	63121-49-3	Fatty Acyls	4.19	312.23	312.231	11.96	1.93949e+08	90.6974
Crocin	C44 H64 O24	42553-65-1	Prenol lipids	4.49	976.379	976.383	9.124	1.91984e+08	89.7788
(2S)-2-phenyl-7-[(2S,3R,4S,5S,6R)-3,4,5-trihydroxy-6-(hydroxymethyl)oxan-2-yl]oxy-2,3-dihydrochromen-4-one	C21 H22 O8	138166-64-0	Flavonoids	3.71	402.131	402.133	9.395	1.82458e+08	85.3241
2,3-Dihydro-1-benzofuran-2-carboxylic acid	C9 H8 O3	1914-60-9	Coumarans	-1.66	164.047	164.047	6.591	1.79304e+08	83.8488
methyl (1S,4aS,7aS)-7-(hydroxymethyl)-1-[(2S,3R,4S,5S,6R)-3,4,5-trihydroxy-6-[[(E)-3-(4-hydroxy-3,5-dimethoxyphenyl)prop-2-enoyl]oxymethyl]oxan-2-yl]oxy-1,4a,5,7a-tetrahydrocyclopenta[c]pyran-4-carboxylate	C28 H34 O14	NA	Others	4.71	594.195	594.198	7.695	1.76683e+08	82.6232
trans-Cinnamic acid	C9 H8 O2	140-10-3	Cinnamic acids and derivatives	-3	148.052	148.052	6.807	1.73392e+08	81.0845
[(2R,3S,4S,5R,6R)-6-[(2S,3S,4S,5R)-3,4-dihydroxy-2,5-bis(hydroxymethyl)oxolan-2-yl]oxy-3,4,5-trihydroxyoxan-2-yl]methyl (E)-3-(4-hydroxy-3,5-dimethoxyphenyl)prop-2-enoate	C23 H32 O15	NA	Cinnamic acids and derivatives	4.3	548.174	548.176	5.71	1.68613e+08	78.8495
Fumaric acid	C4 H4 O4	110-17-8	Carboxylic acids and derivatives	-4.68	116.011	116.01	1.352	1.61639e+08	75.5883
3-Hydroxy-3-methylglutaric acid	C6 H10 O5	503-49-1	Fatty Acyls	-1.88	162.053	162.053	1.448	1.56989e+08	73.4138
4,5-Dicaffeoylquinic acid	C25 H24 O12	14534-61-3	Organooxygen compounds	3.92	516.127	516.129	7.247	1.55778e+08	72.8474
[(2R,3S,4S,5S)-4-hydroxy-2,5-bis(hydroxymethyl)-5-[(2R,3R,4S,5S,6R)-3,4,5-trihydroxy-6-(hydroxymethyl)oxan-2-yl]oxyoxolan-3-yl] (E)-3-phenylprop-2-enoate	C21 H28 O12	NA	Cinnamic acids and derivatives	4.17	472.158	472.16	6.767	1.54593e+08	72.2934
L-Phenylalanine	C9 H11 N O2	63-91-2	Carboxylic acids and derivatives	-1.3	165.079	165.079	2.248	1.50125e+08	70.2041
Genipin	C11 H14 O5	6902-77-8	Prenol lipids	2.03	226.084	226.085	5.695	1.39189e+08	65.0899
1-[4,5-dihydroxy-6-(hydroxymethyl)-3-[(E)-3-(4-hydroxyphenyl)prop-2-enoyl]oxyoxan-2-yl]oxy-6-hydroxy-7-methylidene-4a,5,6,7a-tetrahydro-1H-cyclopenta[c]pyran-4-carboxylic acid	C25 H28 O12	NA	Cinnamic acids and derivatives	4.74	520.158	520.161	6.888	1.3556e+08	63.3928
Sinapinic acid	C11 H12 O5	530-59-6	Cinnamic acids and derivatives	1.87	224.068	224.069	6.876	1.26121e+08	58.9787
Hydroxyferulic acid	C10 H10 O5	1782-55-4	Cinnamic acids and derivatives	0.95	210.053	210.053	5.03	1.21851e+08	56.9817
Biochanin-7-O-glucoside	C22 H22 O10	NA	Others	3.85	446.121	446.123	9.504	1.21176e+08	56.6661
Flavanone + 2O, O-Hex	C21 H22 O9	NA	Others	4.14	418.126	418.128	8.314	1.17976e+08	55.1698
cis-Aconitic acid	C6 H6 O6	585-84-2	Carboxylic acids and derivatives	-1.23	174.016	174.016	0.905	1.12675e+08	52.6907
Genistin	C21 H20 O10	529-59-9	Isoflavonoids	4.11	432.106	432.107	9.504	1.11237e+08	52.0186
Sinapoylhexoside (isomer of 955)	C17 H22 O10	NA	Cinnamic acids and derivatives	4.01	386.121	386.123	5.493	1.10503e+08	51.6751
NCGC00380141-01![3,4,5-trihydroxy-6-[[3,4,5-trihydroxy-6-(hydroxymethyl)oxan-2-yl]oxymethyl]oxan-2-yl] 2,6,6-trimethylcyclohexa-1,3-diene-1-carboxylate	C22 H34 O12	NA	Organooxygen compounds	3.63	490.205	490.207	6.987	1.06083e+08	49.6084
1,6-Bis-O-(3,4,5-trihydroxybenzoyl)hexopyranose	C20 H20 O14	NA	Tannins	4.24	484.085	484.087	3.882	1.04107e+08	48.6843
Phenylacetaldehyde	C8 H8 O	122-78-1	Benzene and substituted derivatives	-4.82	120.058	120.057	6.591	1.01717e+08	47.5665
Geniposidic Acid	C16 H22 O10	27741-01-1	Prenol lipids	4	374.121	374.123	2.189	9.72062e+07	45.4571
L-Histidine	C6 H9 N3 O2	71-00-1	Carboxylic acids and derivatives	-1.9	155.069	155.069	0.735	9.59887e+07	44.8878
N-Fructosyl pyroglutamate	C11 H17 N O8	NA	Carboxylic acids and derivatives	3.76	291.095	291.097	0.852	9.57903e+07	44.795
Citraconic acid	C5 H6 O4	498-23-7	Fatty Acyls	-4.33	130.027	130.026	1.185	9.39485e+07	43.9337
Guanosine	C10 H13 N5 O5	118-00-3	Purine nucleosides	3.65	283.092	283.093	1.322	9.15208e+07	42.7985
[4,5,8-trihydroxy-5-(hydroxymethyl)-3-(3-methoxy-3-oxoprop-1-en-2-yl)-8a-methyl-1,2,3,4,4a,6,7,8-octahydronaphthalen-2-yl] 3,4-dihydroxy-2-methylidenebutanoate	C21 H32 O10	1295308-30-3	Prenol lipids	3.62	444.2	444.201	4.933	8.82631e+07	41.275
Procyanidin B1	C30 H26 O12	20315-25-7	Flavonoids	4.09	578.142	578.145	5.625	8.81606e+07	41.2271
L-Tyrosine	C9 H11 N O3	60-18-4	Carboxylic acids and derivatives	-0.4	181.074	181.074	1.241	8.70413e+07	40.7037
Benzoic acid + 1O, 1MeO, O-Hex	C14 H18 O9	NA	Tannins	4.08	330.095	330.096	3.07	8.62538e+07	40.3354
1-[4,5-Dihydroxy-6-(hydroxymethyl)-3-[(E)-3-(4-hydroxyphenyl)prop-2-enoyl]oxyoxan-2-yl]oxy-7-hydroxy-7-methyl-4a,5,6,7a-tetrahydro-1H-cyclopenta[c]pyran-4-carboxylic acid	C25 H30 O12	NA	Prenol lipids	4.32	522.174	522.176	6.356	8.55392e+07	40.0012
Quinic acid 右旋奎宁酸	C7 H12 O6	77-95-2	Organooxygen compounds	-0.1	192.063	192.063	1.408	8.55011e+07	39.9834
6-O-[(2E)-3-(4-Hydroxyphenyl)-2-propenoyl]-1-O-(3,4,5-trihydroxybenzoyl)hexopyranose	C22 H22 O12	NA	Tannins	3.77	478.111	478.113	6.175	8.1835e+07	38.269
Perillic acid	C10 H14 O2	7694-45-3	Prenol lipids	-1.41	166.099	166.099	4.438	8.0729e+07	37.7518
(2R,3S,4S,5R,6S)-2-[[(2S,3R,4R)-3,4-dihydroxy-4-(hydroxymethyl)oxolan-2-yl]oxymethyl]-6-(3,4,5-trimethoxyphenoxy)oxane-3,4,5-triol	C20 H30 O13	NA	Organooxygen compounds	3.87	478.169	478.17	5.391	7.78019e+07	36.383
Mussaenosidic acid	C16 H24 O10	82451-22-7	Prenol lipids	3.83	376.137	376.138	4.45	7.71818e+07	36.093
(1R,3R,4S,5R)-1,3,4-trihydroxy-5-[(E)-3-(4-hydroxyphenyl)prop-2-enoyl]oxycyclohexane-1-carboxylic acid	C16 H18 O8	87099-71-6	Organooxygen compounds	4	338.1	338.102	5.136	7.67138e+07	35.8742
2,6-Bis[(2-hydroxyethyl)amino]-3-nitrobenzonitrile	C11 H14 N4 O4	NA	Benzene and substituted derivatives	-1.68	266.101	266.101	1.453	7.44167e+07	34.8
3-O-Feruloylquinic acid	C17 H20 O9	62929-69-5	Organooxygen compounds	3.84	368.111	368.112	7.078	7.31121e+07	34.1899
DL-α-Methoxyphenylacetic acid	C9 H10 O3	7021-09-2	Benzene and substituted derivatives	-1.88	166.063	166.063	5.6	7.28261e+07	34.0561
4-Hydroxybenzoic acid	C7 H6 O3	99-96-7	Benzene and substituted derivatives	-3.56	138.032	138.031	5.062	6.76946e+07	31.6565
Phloretin-2'-O-glucoside	C21 H24 O10	NA	Flavonoids	3.66	436.137	436.139	7.46	6.30717e+07	29.4946
Salicylic acid	C7 H6 O3	69-72-7	Benzene and substituted derivatives	-3.56	138.032	138.031	5.209	6.24703e+07	29.2134
2-(Acetylamino)hexanoic acid	C8 H15 N O3	7682-16-8	Carboxylic acids and derivatives	-1.15	173.105	173.105	6.055	6.06688e+07	28.3709
Benzoic acid + 1O, 2MeO, O-Hex	C15 H20 O10	NA	Tannins	3.63	360.106	360.107	4.749	6.04364e+07	28.2622
Phloretin	C15 H14 O5	60-82-2	Linear 1,3-diarylpropanoids	3.88	274.084	274.085	6.881	5.96271e+07	27.8838
N-Acetyl-DL-norvaline	C7 H13 N O3	7682-15-7	Carboxylic acids and derivatives	-1.77	159.09	159.089	4.523	5.79774e+07	27.1123
Aloesin	C19 H22 O9	30861-27-9	Organooxygen compounds	4.12	394.126	394.128	5.562	5.40566e+07	25.2788
Matairesinol	C20 H22 O6	580-72-3	Furanoid lignans	4.15	358.142	358.143	9.747	5.3788e+07	25.1532
Guanosine 5'-monophosphate	C10 H14 N5 O8 P	85-32-5	Purine nucleotides	4.37	363.058	363.06	1.26	5.37191e+07	25.121
2-Methylbenzoic acid	C8 H8 O2	118-90-1	Benzene and substituted derivatives	-3.49	136.052	136.052	7.938	5.32672e+07	24.9097
Sennoside B	C42 H38 O20	128-57-4	Anthracenes	4.72	862.196	862.2	6.768	5.3156e+07	24.8577
FA 9:2+1O	C9 H14 O3	NA	Keto acids and derivatives	-1.69	170.094	170.094	10.27	5.30368e+07	24.8019
6:3+6O fatty acyl hexoside	C12 H18 O12	NA	Fatty Acyls	3.77	354.08	354.081	0.845	5.25427e+07	24.5709
p-Coumaryl alcohol 4-glucoside	C15 H20 O7	120442-73-1	Organooxygen compounds	4	312.121	312.122	6.713	5.19529e+07	24.295
Astragalin	C21 H20 O11	480-10-4	Flavonoids	4.35	448.101	448.103	7.08	5.0328e+07	23.5352
Trehalose-6-Phosphate	C12 H23 O14 P	4484-88-2	Organooxygen compounds	4.46	422.083	422.084	0.725	4.90645e+07	22.9444
5-Fluoro NNEI	C24 H23 F N2 O	1445580-60-8	Indoles and derivatives	-4.61	374.179	374.178	10.106	4.86649e+07	22.7575
5,7-Dihydroxychromone	C9 H6 O4	31721-94-5	Benzopyrans	-0.85	178.027	178.026	5.828	4.80264e+07	22.4589
Coumaroyl Hexoside (isomer of 690, 691)	C15 H18 O8	14364-05-7	Organooxygen compounds	3.66	326.1	326.101	5.303	4.76447e+07	22.2804
3,5-Dihydroxybenzoic acid	C7 H6 O4	99-10-5	Benzene and substituted derivatives	-2.07	154.027	154.026	3.5	4.60312e+07	21.5259
Procyanidin C1	C45 H38 O18	37064-30-5	Flavonoids	4.03	866.206	866.209	5.394	4.55482e+07	21.3
Rhein	C15 H8 O6	478-43-3	Anthracenes	3.65	284.032	284.033	6.57	4.42529e+07	20.6943
Uridine	C9 H12 N2 O6	58-96-8	Pyrimidine nucleosides	3.29	244.07	244.07	1.177	4.41727e+07	20.6567
4-((5-(4-Nitrophenyl)oxazol-2-yl)amino)benzonitrile	C16 H10 N4 O3	NA	Azoles	-0.47	306.075	306.075	3.621	4.41278e+07	20.6358
4-Hydroxybenzylalcohol	C7 H8 O2	623-05-2	Benzene and substituted derivatives	-4.11	124.052	124.052	5.693	4.26875e+07	19.9622
D-Pantothenic acid hemicalcium salt	C9 H17 N O5	NA	Others	1.38	219.111	219.111	2.856	4.24573e+07	19.8546
Apigenin-8-C-glucoside	C21 H20 O10	3681-93-4	Flavonoids	3.74	432.106	432.107	7.757	4.20585e+07	19.6681
[3,4,5-trihydroxy-6-[[(E)-3-(4-hydroxyphenyl)prop-2-enoyl]oxymethyl]oxan-2-yl] 3,4,5-trihydroxybenzoate	C22 H22 O12	NA	Tannins	4.08	478.111	478.113	6.796	4.17822e+07	19.5389
Jasmonic acid	C12 H18 O3	59366-47-1	Fatty Acyls	0.87	210.126	210.126	10.384	4.15031e+07	19.4084
Salidroside	C14 H20 O7	10338-51-9	Organooxygen compounds	4.25	300.121	300.122	4.716	4.0874e+07	19.1142
Eriodictyol-7-O-glucoside	C21 H22 O11	38965-51-4	Flavonoids	4.06	450.116	450.118	6.671	4.01634e+07	18.7819
NCGC00380271-01_C24H40O11_2-Cyclohexen-1-one, 3,5,5-trimethyl-4-[3-[(6-O-beta-D-xylopyranosyl-beta-D-glucopyranosyl)oxy]butyl]-	C24 H40 O11	NA	Others	4.23	504.257	504.259	6.868	3.88164e+07	18.1519
cis,cis-Muconic acid	C6 H6 O4	1119-72-8	Fatty Acyls	-3	142.027	142.026	2.464	3.87585e+07	18.1249
Ferulic acid	C10 H10 O4	537-98-4	Cinnamic acids and derivatives	0.38	194.058	194.058	5.43	3.80154e+07	17.7774
(1R,2R,4S,7R,8S,12R)-7-(furan-3-yl)-1,8,12,17,17-pentamethyl-3,6,16-trioxapentacyclo[9.9.02,4.02,8.012,18]icos-13-ene-5,15,20-trione	C26 H30 O7	NA	Others	4.9	454.199	454.201	11.71	3.79089e+07	17.7276
(-)-Camphanic acid	C10 H14 O4	13429-83-9	Lactones	0.5	198.089	198.089	5.99	3.67161e+07	17.1698
(1S,3R,4S,5R)-4-{[(2E)-3-(3,4-dihydroxyphenyl)prop-2-enoyl]oxy}-1,3,5-trihydroxycyclohexane-1-carboxylic acid	C16 H18 O9	NA	Others	4.11	354.095	354.097	6.326	3.47009e+07	16.2274
3-Hydroxy-3-(methoxycarbonyl)pentanedioic acid	C7 H10 O7	26163-65-5	Carboxylic acids and derivatives	0.79	206.043	206.043	1.964	3.40402e+07	15.9184
NCGC00380844-01_C19H25NO10_beta-D-Glucopyranoside, 1H-indol-3-yl 6-O-[(2R,3R,4R)-tetrahydro-3,4-dihydroxy-4-(hydroxymethyl)-2-furanyl]-	C19 H25 N O10	NA	Organooxygen compounds	4.3	427.148	427.15	4.812	3.32542e+07	15.5509
Benzoic acid + 1O, O-Hex	C13 H16 O8	NA	Tannins	3.46	300.085	300.086	3.871	3.18887e+07	14.9123
4-(3-Hydroxybutyl)phenyl β-D-glucopyranoside	C16 H24 O7	NA	Organooxygen compounds	4.14	328.152	328.154	6.063	3.18634e+07	14.9005
4-(3,4-Dihydroxyphenyl)-6,7-dihydroxy-2-naphthoic acid	C17 H12 O6	NA	Naphthalenes	3.46	312.063	312.064	10.978	3.16454e+07	14.7985
NCGC00385183-01!(9R)-9-[(9R)-2-carboxy-4-hydroxy-10-oxo-5-[(2S,3R,4S,5S,6R)-3,4,5-trihydroxy-6-(hydroxymethyl)oxan-2-yl]oxy-9H-anthracen-9-yl]-4-hydroxy-10-oxo-5-[(2S,3R,4S,5S,6R)-3,4,5-trihydroxy-6-(hydroxymethyl)oxan-2-yl]oxy-9H-anthracene-2-carboxylic acid	C42 H38 O20	NA	Others	4.87	862.196	862.2	6.34	3.15754e+07	14.7658
Methoxytyrosine	C10 H13 N O4	7636-26-2	Carboxylic acids and derivatives	1	211.084	211.085	5.808	3.10189e+07	14.5056
Caffeic acid hexoside	C15 H18 O9	14364-08-0	Cinnamic acids and derivatives	4.25	342.095	342.097	4.559	3.10145e+07	14.5035
1-(4-hydroxyphenyl)-3-[(2R,3R,4S,5S,6R)-3,4,5-trihydroxy-6-(hydroxymethyl)oxan-2-yl]oxypropan-1-one	C15 H20 O8	NA	Others	4.22	328.116	328.117	5.707	3.10077e+07	14.5003
2-[3-ethenyl-5-methoxycarbonyl-2-[(2S,3R,4S,5S,6R)-3,4,5-trihydroxy-6-(hydroxymethyl)oxan-2-yl]oxy-3,4-dihydro-2H-pyran-4-yl]acetic acid	C17 H24 O11	NA	Prenol lipids	4.2	404.132	404.134	4.755	3.10035e+07	14.4984
Apodanthoside (Not validated)	C17 H22 O11	NA	Prenol lipids	3.83	402.116	402.118	5.952	3.05483e+07	14.2855
N-Acetyl-DL-tryptophan	C13 H14 N2 O3	87-32-1	Carboxylic acids and derivatives	2.87	246.1	246.101	6.916	3.05084e+07	14.2668
N-Acetylalanine	C5 H9 N O3	97-69-8	Carboxylic acids and derivatives	-3.63	131.058	131.058	1.278	3.0237e+07	14.1399
(2R,3R,4S,5S,6R)-2-[(E)-3-[3,5-dimethoxy-4-[(2S,3R,4S,5S,6R)-3,4,5-trihydroxy-6-(hydroxymethyl)oxan-2-yl]oxyphenyl]prop-2-enoxy]-6-(hydroxymethyl)oxane-3,4,5-triol	C23 H34 O14	152686-85-6	Organooxygen compounds	4.07	534.195	534.197	5.082	2.94218e+07	13.7587
[6-[3,4-dihydroxy-2,5-bis(hydroxymethyl)oxolan-2-yl]oxy-3,4,5-trihydroxyoxan-2-yl]methyl (E)-3-(4-hydroxy-3-methoxyphenyl)prop-2-enoate	C22 H30 O14	137941-45-8	Cinnamic acids and derivatives	4.28	518.164	518.166	5.777	2.93275e+07	13.7146
Isosakuranin 异樱花苷	C22 H24 O10	491-69-0	Flavonoids	4.02	448.137	448.139	9.01	2.92433e+07	13.6752
Adipic acid	C6 H10 O4	124-04-9	Fatty Acyls	-2.64	146.058	146.058	1.695	2.89075e+07	13.5182
3-Butene-1,2,3-tricarboxylic acid	C7 H8 O6	26326-05-6	Carboxylic acids and derivatives	2.59	188.032	188.033	1.345	2.88502e+07	13.4914
Hydroxysebacic acid	C10 H18 O5	NA	Hydroxy acids and derivatives	1.57	218.115	218.116	6.828	2.86365e+07	13.3915
Glutaric acid	C5 H8 O4	110-94-1	Carboxylic acids and derivatives	-3.88	132.042	132.042	1.993	2.859e+07	13.3697
FA 9:1+1O	C9 H16 O3	2553-17-5	Fatty Acyls	-0.36	172.11	172.11	8.976	2.82312e+07	13.2019
trans-Piceid	C20 H22 O8	27208-80-6	Stilbenes	4.26	390.131	390.133	8.118	2.80445e+07	13.1146
5-Isoxazol-5-yl-N-[4-(4-methylpiperazin-1-yl)benzyl]thiophene-2-sulfonamide	C19 H22 N4 O3 S2	NA	Diazinanes	-0.68	418.113	418.113	4.876	2.77947e+07	12.9978
Endothal	C8 H10 O5	145-73-3	Carboxylic acids and derivatives	-0.16	186.053	186.053	2.094	2.75605e+07	12.8883
N-Acetylglutamic acid	C7 H11 N O5	1188-37-0	Carboxylic acids and derivatives	0.89	189.064	189.064	1.208	2.70391e+07	12.6445
(2R,3R,4S,5S,6R)-2-[3-[2-(4-hydroxy-3-methoxyphenyl)-3-(hydroxymethyl)-7-methoxy-2,3-dihydro-1-benzofuran-5-yl]propoxy]-6-(hydroxymethyl)oxane-3,4,5-triol	C26 H34 O11	NA	2-arylbenzofuran flavonoids	3.69	522.21	522.212	7.576	2.69198e+07	12.5887
FA 18:4+2O	C18 H28 O4	NA	Fatty Acyls	3.81	308.199	308.2	10.732	2.66515e+07	12.4632
Citramalic acid	C5 H8 O5	490-83-5	Fatty Acyls	-2.71	148.037	148.037	1.13	2.6516e+07	12.3998
feruloyltyramine	C18 H19 N O4	65646-26-6	Phenols	3.94	313.131	313.133	8.329	2.53672e+07	11.8626
Eriodictyol	C15 H12 O6	552-58-9	Flavonoids	3.37	288.063	288.064	8.817	2.528e+07	11.8218
3-tert-Butyladipic acid	C10 H18 O4	10347-88-3	Fatty Acyls	0.62	202.121	202.121	8.637	2.52436e+07	11.8048
5,7-Dihydroxy-4-methylcoumarin	C10 H8 O4	2107-76-8	Coumarins and derivatives	0.03	192.042	192.042	8.339	2.50828e+07	11.7296
Aspalathin	C21 H24 O11	6027-43-6	Linear 1,3-diarylpropanoids	4.47	452.132	452.134	3.65	2.40101e+07	11.228
Methyl 2-(2,6-dihydroxy-4-methylbenzoyl)-3,5-dihydroxybenzoate	C16 H14 O7	57459-06-0	Benzene and substituted derivatives	3.37	318.074	318.075	6.881	2.34141e+07	10.9493
Disperse orange 3	C12 H10 N4 O2	730-40-5	Azobenzenes	-2.69	242.08	242.08	5.969	2.33964e+07	10.941
Rutaevin	C26 H30 O9	33237-37-5	Steroids and steroid derivatives	3.9	486.189	486.191	10.592	2.31946e+07	10.8466
FA 18:3+2O	C18 H30 O4	NA	Fatty Acyls	4	310.214	310.216	11.275	2.25076e+07	10.5254
NCGC00380892-01_C26H30O12_Cyclopenta[c]pyran-4-carboxylic acid, 1,4a,5,7a-tetrahydro-7-(hydroxymethyl)-1-[[6-O-[(2E)-3-(4-hydroxyphenyl)-1-oxo-2-propen-1-yl]-beta-D-glucopyranosyl]oxy]-, methyl ester	C26 H30 O12	NA	Prenol lipids	4.22	534.174	534.176	7.766	2.2457e+07	10.5017
Plumbagin	C11 H8 O3	481-42-5	Naphthalenes	-0.15	188.047	188.047	5.116	2.23956e+07	10.473
6-Methoxysalicylic acid	C8 H8 O4	3147-64-6	Benzene and substituted derivatives	-1.23	168.042	168.042	3.03	2.20605e+07	10.3163
Shikimic acid 莽草酸	C7 H10 O5	138-59-0	Organooxygen compounds	-0.87	174.053	174.053	1.045	2.15428e+07	10.0742
3-Methylsalicylic acid	C8 H8 O3	83-40-9	Benzene and substituted derivatives	-2.49	152.047	152.047	8.96	2.13042e+07	9.96261
(+/-)12(13)-DiHOME	C18 H34 O4	263399-35-5	Fatty Acyls	4.28	314.246	314.247	11.861	2.11192e+07	9.8761
α-Aspartylphenylalanine	C13 H16 N2 O5	13433-09-5	Carboxylic acids and derivatives	3.66	280.106	280.107	2.308	2.11164e+07	9.87479
[(2S,3R,4S,5S,6R)-3,4,5-trihydroxy-6-(hydroxymethyl)oxan-2-yl] (2E,6E)-8-hydroxy-2,6-dimethylocta-2,6-dienoate	C16 H26 O8	NA	Prenol lipids	3.87	346.163	346.164	6.651	2.06931e+07	9.67685
2-(3-hydroxy-5-methoxyphenoxy)-6-(hydroxymethyl)oxane-3,4,5-triol	C13 H18 O8	NA	Organooxygen compounds	3.7	302.1	302.101	1.922	2.04761e+07	9.57539
Naringenin	C15 H12 O5	480-41-1	Flavonoids	3.89	272.068	272.07	9.713	2.03999e+07	9.53973
2-Furoic acid	C5 H4 O3	88-14-2	Furans	-4.7	112.016	112.016	1.786	1.91439e+07	8.95237
1-(β-D-Glucopyranosyloxy)-7-methyl-1,4a,5,6,7,7a-hexahydrocyclopenta[c]pyran-4-carboxylic acid	C16 H24 O9	NA	Prenol lipids	4.1	360.142	360.144	1.972	1.88417e+07	8.81106
Dihydrobenzoic acid pentose	C12 H14 O8	143986-30-5	Benzene and substituted derivatives	3.8	286.069	286.07	4.708	1.87879e+07	8.78592
4-Nitrocatechol	C6 H5 N O4	3316-09-4	Phenols	-2.32	155.022	155.022	6.972	1.78937e+07	8.36772
Phenylacetic acid + 2O, O-Hex	C14 H18 O9	NA	Organooxygen compounds	3.4	330.095	330.096	4.938	1.73329e+07	8.10547
Geniposidic Acid	C16 H22 O10	27741-01-1	Prenol lipids	4.07	374.121	374.123	4.086	1.72396e+07	8.06186
DL-4-Hydroxyphenyllactic acid	C9 H10 O4	306-23-0	Phenylpropanoic acids	-0.69	182.058	182.058	4.668	1.65564e+07	7.74238
7-Hydroxy-2-(4-hydroxyphenyl)-4-oxo-3,4-dihydro-2H-chromen-5-yl β-D-glucopyranoside	C21 H22 O10	NA	Flavonoids	4.13	434.121	434.123	7.21	1.64958e+07	7.71405
N-Acetyl-L-tyrosine	C11 H13 N O4	537-55-3	Carboxylic acids and derivatives	1.84	223.084	223.085	4.84	1.56365e+07	7.31222
Porphobilinogen	C10 H14 N2 O4	487-90-1	Organonitrogen compounds	2.13	226.095	226.096	2.663	1.56243e+07	7.30648
(2R,7S,13R,14R,16S,19R,20S)-19-(furan-3-yl)-11-hydroxy-9,9,13,20-tetramethyl-4,8,15,18-tetraoxahexacyclo[11.9.0.0²,⁷.0²,¹⁰.0¹⁴,¹⁶.0¹⁴,²⁰]docos-10-ene-5,12,17-trione	C26 H28 O9	NA	Others	3.83	484.173	484.175	11.088	1.53916e+07	7.19765
apigenin-7-O-glucuronide	C21 H18 O11	29741-09-1	Flavonoids	4.25	446.085	446.087	7.684	1.51669e+07	7.09257
Syringic acid	C9 H10 O5	530-57-4	Benzene and substituted derivatives	0.16	198.053	198.053	4.209	1.50869e+07	7.0552
NCGC00380817-01_C15H20O9_	C15 H20 O9	NA	Organooxygen compounds	3.63	344.111	344.112	4.305	1.49992e+07	7.01419
3-hydroxy-1-(4-hydroxyphenyl)propan-1-one	C9 H10 O3	53170-93-7	Organooxygen compounds	-1.79	166.063	166.063	4.186	1.49494e+07	6.99089
Naringenin-7-O-glucoside	C21 H22 O10	529-55-5	Flavonoids	4.23	434.121	434.123	7.815	1.44684e+07	6.76594
Quinic acid	C7 H12 O6	77-95-2	Organooxygen compounds	0.37	192.063	192.063	2.229	1.42157e+07	6.64776
NCGC00381184-01_C15H20O9_	C15 H20 O9	NA	Organooxygen compounds	3.93	344.111	344.112	6.35	1.4178e+07	6.63013
3-Hydroxy-3-methylbutanoic acid	C5 H10 O3	625-08-1	Fatty Acyls	-4.59	118.063	118.062	2.173	1.41443e+07	6.6144
Isofraxidin	C11 H10 O5	486-21-5	Coumarins and derivatives	2	222.053	222.053	7.04	1.38323e+07	6.46846
3,5-dihydroxy-2-(4-hydroxyphenyl)-7-[3,4,5-trihydroxy-6-(hydroxymethyl)oxan-2-yl]oxy-2,3-dihydrochromen-4-one	C21 H22 O11	NA	Flavonoids	3.89	450.116	450.118	5.949	1.37364e+07	6.42362
3',5,7-Trihydroxy-4'-methoxyflavanone	C16 H14 O6	520-33-2;41001-90-5	Flavonoids	3.31	302.079	302.08	9.833	1.32624e+07	6.20197
3',4'-Dihydroxyphenylacetone	C9 H10 O3	2503-44-8	Benzene and substituted derivatives	-1.33	166.063	166.063	8.104	1.30594e+07	6.10706
6-Hydroxycaproic acid	C6 H12 O3	1191-25-9	Hydroxy acids and derivatives	-3.83	132.079	132.078	6.065	1.30328e+07	6.09461
Sissotrin	C22 H22 O10	5928-26-7	Isoflavonoids	3.54	446.121	446.123	6.807	1.23931e+07	5.79547
3-[2-(β-D-Glucopyranosyloxy)-4-methoxyphenyl]propanoic acid	C16 H22 O9	NA	Organooxygen compounds	4.1	358.126	358.128	4.932	1.23344e+07	5.76803
NCGC00380914-01_C32H38O17_alpha-D-Glucopyranoside, 3,6-bis-O-[(2E)-3-(4-hydroxy-3-methoxyphenyl)-1-oxo-2-propen-1-yl]-beta-D-fructofuranosyl	C32 H38 O17	NA	Cinnamic acids and derivatives	4.21	694.211	694.214	7.611	1.21322e+07	5.67343
3,5-dihydroxy-2-(4-hydroxyphenyl)-6-(3-methylbut-2-enyl)-7-[3,4,5-trihydroxy-6-(hydroxymethyl)oxan-2-yl]oxy-2,3-dihydrochromen-4-one	C26 H30 O11	NA	Flavonoids	4.06	518.179	518.181	7.547	1.19611e+07	5.59347
Citrinin	C13 H14 O5	518-75-2	Benzopyrans	2.85	250.084	250.085	6.805	1.18642e+07	5.54812
2-Furoylglycine	C7 H7 N O4	5657-19-2	Carboxylic acids and derivatives	-1.46	169.038	169.037	9.039	1.15402e+07	5.3966
1,9b-Dihydroxy-6,6,9a-trimethyl-5,5a,6,7,8,9,9a,9b-octahydronaphtho[1,2-c]furan-3(1H)-one	C15 H22 O4	NA	Naphthofurans	3.44	266.152	266.153	10.597	1.14172e+07	5.33909
Soyasaponin Bb	C48 H78 O18	51330-27-9	Prenol lipids	4.73	942.519	942.523	10.089	1.1223e+07	5.24829
6,7,8-Triphenyl-2,3-dihydro[1,2,4]triazolo[4,3-b]pyridazin-3-one	C23 H16 N4 O	NA	Diazines	-4.73	364.132	364.131	6.317	1.10024e+07	5.14513
(2'R,3R,4'R,4a'R,5S,8a'S)-5-(3-Furyl)-4'-hydroxy-4a',5'-bis(hydroxymethyl)-2'-methyl-3',4,4',4a',5,7',8',8a'-octahydro-2'H-spiro[furan-3,1'-naphthalen]-2-one	C20 H26 O6	NA	Prenol lipids	4.03	362.173	362.174	7.591	1.0991e+07	5.13979
2-Methylidene-4-[(2R,3R,4S,5S,6R)-3,4,5-trihydroxy-6-(hydroxymethyl)oxan-2-yl]oxybutanoic acid	C11 H18 O8	NA	Saccharolipids	3.53	278.1	278.101	1.534	1.09617e+07	5.12611
FA 9:0+1O	C9 H18 O3	33796-87-1	Hydroxy acids and derivatives	-1.06	174.126	174.125	10.32	1.07679e+07	5.03545
(1S,4S,8R,14S)-11-ethyl-12-oxo-7,9,13-trioxatetracyclo[6.5.1.0¹,¹⁰.0⁴,¹⁴]tetradeca-2,5-diene-5-carboxylic acid	C14 H14 O6	NA	Others	3.72	278.079	278.08	6.226	1.0657e+07	4.98358
DL-Mandelic acid	C8 H8 O3	614-75-5	Benzene and substituted derivatives	-2.39	152.047	152.047	3.972	1.05814e+07	4.94827
Arginine	C6 H14 N4 O2	74-79-3	Carboxylic acids and derivatives	-1.39	174.112	174.111	1.504	1.05551e+07	4.93593
Methyl salicylate	C8 H8 O3	119-36-8	Benzene and substituted derivatives	-0.67	152.047	152.047	7.917	1.04646e+07	4.89362
Resveratrol	C14 H12 O3	501-36-0	Stilbenes	1.66	228.079	228.079	8.201	1.04418e+07	4.88295
Thymidine	C10 H14 N2 O5	50-89-5	Pyrimidine nucleosides	3.27	242.09	242.091	2.161	1.03645e+07	4.84681
13(S)-HOTrE	C18 H30 O3	87984-82-5	Fatty Acyls	3.74	294.219	294.221	13.39	1.00327e+07	4.69168
2-AMINO-3-(2-CHLORO-PHENYL)-PROPIONIC ACID	C9 H10 Cl N O2	14091-11-3	内标	0.85	199.04	199.04	4.523	1.09606e+07	1
